# Supplementary material for: Molecular dynamics investigation on the nano-mechanical behaviour of C60 fullerene and its crystallized structure
Source: Royal Society of Chemistry journal article supplement (doi:10.1039/d0nr00584c), 2020-01-01
Supplement: d0nr00584c1.pdf [file d0nr00584c1.pdf]

Description of Multimedia Files

*for*

**Molecular dynamics investigation on the nano-mechanical behaviour of C<sub>60</sub> fullerene and its crystallized structure**

Kuk-Jin Seo<sup>a</sup> and Dae-Eun Kim<sup>\*a</sup>

a. Department of Mechanical Engineering, Yonsei University, Seoul 03722, Republic of Korea

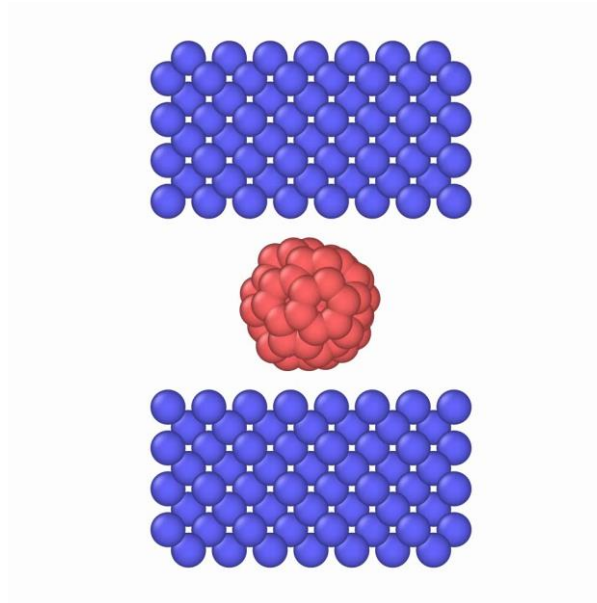

**Movie S1.** Animation of the compression and unloading simulation of elastically deformed single  $C_{60}$  fullerene model. Since the indentation and unloading were conducted at a speed of  $0.1 \text{ \AA}/\text{ps}$ , simulation time of the animation is approximately 90 ps. The image above is captured at the last moment of the animation.

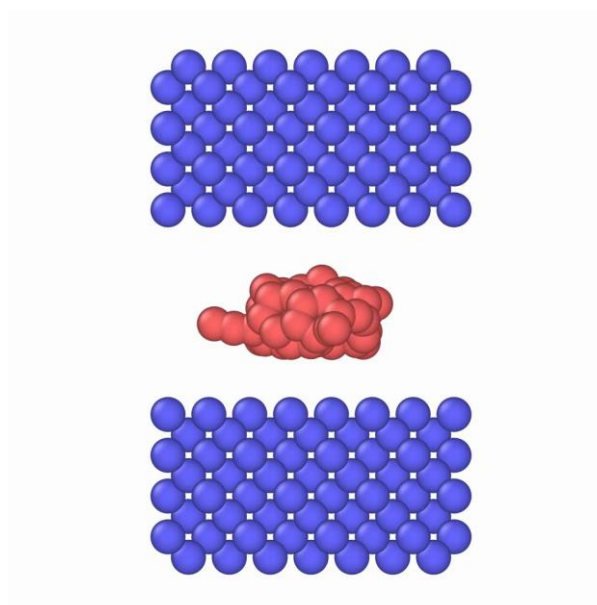

**Movie S2.** Animation of the compression and unloading simulation of plastically deformed single  $C_{60}$  fullerene model. Since the indentation and unloading were conducted at a speed of  $0.1 \text{ \AA}/\text{ps}$ , simulation time of the animation is approximately 140 ps. The image above is captured at the last moment of the animation.

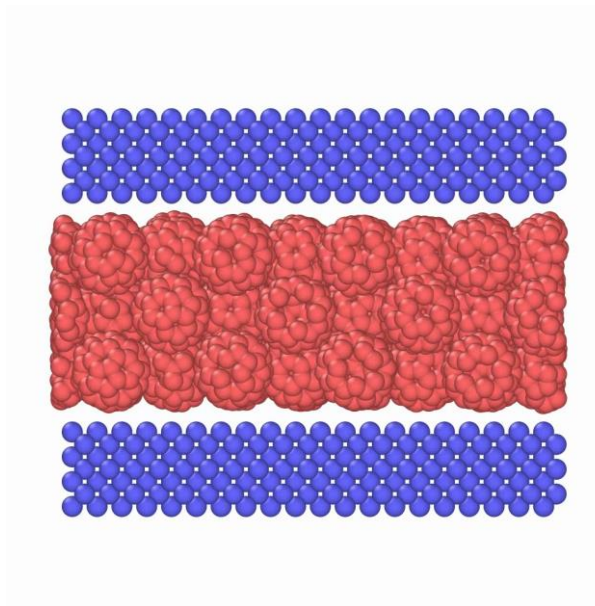

**Movie S3.** Animation of the compression and unloading simulation of elastically deformed crystallized  $C_{60}$  fullerite model. Since the indentation and unloading were conducted at a speed of  $0.1 \text{ \AA}/\text{ps}$ , simulation time of the animation is approximately 150 ps. The image above is captured at the last moment of the animation.

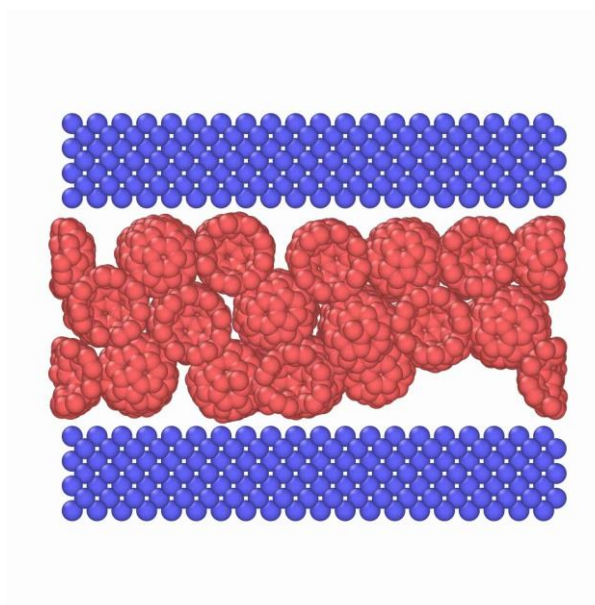

**Movie S4.** Animation of the compression and unloading simulation of semi-elastically deformed crystallized  $C_{60}$  fullerite model. Since the indentation and unloading were conducted at a speed of  $0.1 \text{ \AA}/\text{ps}$ , simulation time of the animation is approximately 230 ps. The image above is captured at the last moment of the animation.

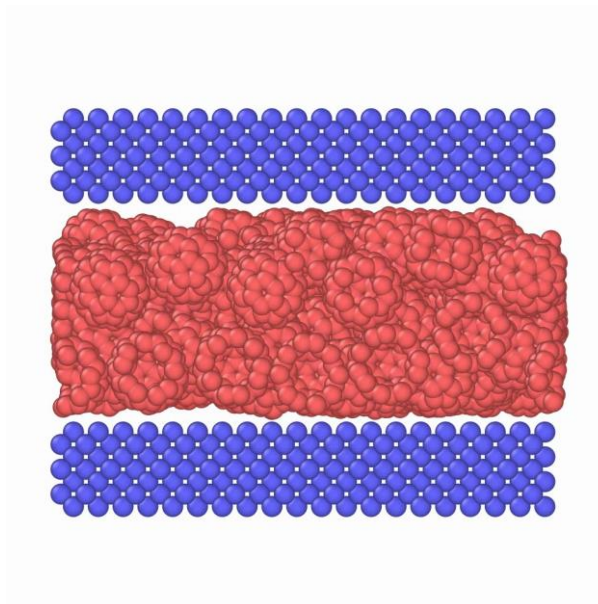

**Movie S5.** Animation of the compression and unloading simulation of plastically deformed crystallized  $C_{60}$  fullerite model. Since the indentation and unloading were conducted at a speed of  $0.1 \text{ \AA/ps}$ , simulation time of the animation is approximately 240 ps. The image above is captured at the last moment of the animation.
